# Supplementary material
Source: publisher site journal article supplement (https://www.dovepress.com/article/supplementary_file/555260/555260%20Table%20S1.xlsx)
Supplement: Supplementary file 1 [file 555260%20Table%20S1.xlsx]

## Sheet: Table S1 The proportion of 22 i
Table S1 The proportion of 22 immune cell types in each sample from both the control and sepsis groups
	B cells naive	B cells memory	Plasma cells	T cells CD8	T cells CD4 naive	T cells CD4 memory resting	T cells CD4 memory activated	T cells follicular helper	T cells regulatory (Tregs)	T cells gamma delta	NK cells resting	NK cells activated	Monocytes	Macrophages M0	Macrophages M1	Macrophages M2	Dendritic cells resting	Dendritic cells activated	Mast cells resting	Mast cells activated	Eosinophils	Neutrophils	P-value	Correlation	RMSE
GSM3942733	0.047200090998356	0	0.00223163396219074	0.150667845059942	0.0570265414638026	0.0873480923533763	0.03754232636279	0	0	0	0.109325108038965	0	0.191877193426473	0.00206706451231786	0	0	0	0	0.0180066071282445	0	0	0.296707496693542	0	0.806521318039701	0.639804865426171
GSM3942734	0.0403065074936928	0	0.00324259829946812	0.0992264527830076	0.0163265509809802	0.0959910117573343	0.043285659415345	0	0	0	0.0897756553898556	0	0.170827392437924	0.00525672699241481	0	0	0	0	0.0143717194552775	0	0	0.421389724994701	0	0.820417799653881	0.5971709208378
GSM3942735	0.0238972019088739	0.000757845630513738	0.00430895443388592	0.139719787396104	0.0205960156717396	0.100054692341226	0.0386248605425419	0	0	0	0.10746912036675	0	0.221770297179943	0.000230713267563351	0	0	0	0	0.00698132584678401	0	0	0.335589185414075	0	0.819131429441727	0.613945539492019
GSM3942736	0.0126225770060043	0	0.00737090850666888	0.145530013839392	0.0717932464409664	0.112468090353289	0.0369819615331515	0	0	0	0.113007449393574	0	0.13740842300426	0.00860537522293548	0	0	0	0	0.0114976730874134	0	0	0.342714281612345	0	0.796089180522349	0.639830114547857
GSM3942737	0.00880999879657336	0.00799342059007313	0.00730193706349022	0.178555060104663	0.0927257287488224	0.0637196278741753	0.0176733307461758	0	0	0	0.097851782360442	0	0.166742353711836	0	0	0	0	0.000308356531857153	0.0123242379360845	0	0	0.345994165535807	0	0.8010920675339	0.631702522975415
GSM3942738	0.0289689612326966	0.00178823957207401	0.00436665695725527	0.105034464259363	0.100240154128182	0.153021683752603	0.020886272028467	0	0	0	0.0836986927704164	0	0.146994840041727	0.0190385473351308	0	0	0	0	0.00823862666969586	0	0	0.327722861252388	0	0.795351978639918	0.644657679435278
GSM3942739	0.0408082527294762	0	0.00583890742208562	0.0493504436723697	0.1360137251944	0.0941962594677743	0.0236172391934851	0	0	0	0.11709671975019	0	0.14419330546802	0.00568645245712615	0	0	0	0	0.00474104469521084	0	0	0.378457649949863	0	0.818521825448348	0.61073182606191
GSM3942740	0.0245776862611641	0	0.0124476746127997	0.153056180092371	0.0359337392067345	0.111511104710391	0.056093528849099	0	0	0	0.125714226708039	0	0.113173874613099	0.00287542013073578	0.000214718852855572	0	0	0	0.00602428133891734	0	0	0.358377564623794	0	0.802757944330965	0.631884521726758
GSM3942741	0.0223578597976602	0	0.00831087853096019	0.0657226121620155	0.180975197738532	0.0912085446325205	0.0221153827273468	0	0	0	0.0805770576765521	0	0.146968136945806	0	0	0	0	0.00193712158595572	0.0161676940707423	0	0	0.363659514131909	0	0.777402305283555	0.65341245515818
GSM3942742	0.0143062937059216	0.0282521444351252	0.00249592056853263	0.0143969489170296	0.0445662400450666	0.102746186391114	0.0245705866191358	0	0	0	0.128318235786871	0	0.159881083985528	0.000193919625859002	0	0	0	0.00134898283061422	0.014036333988536	0	0	0.464887123100666	0	0.805829008256405	0.604504556304802
GSM3942743	0.0135969296789672	0.00797138416062991	0.00698044343965287	0.0514037602844421	0.0962768421252568	0.0960334116475262	0.0287653516884694	0	0	0	0.119390777840913	0	0.171636138864464	0.00592557919941101	0	0	0	0.000247194319366367	0.00843270602934129	0	0	0.393339480721559	0	0.809953729005002	0.613656917039773
GSM3942744	0.0141595587550139	0.001949155741963	0.00369925667770938	0.088221359092065	0.076564590636124	0.111883811465829	0.0265511640389158	0	0	0	0.153109717175224	0	0.197531784906989	0	0	0	0	0	0.0239699825714351	0	0	0.302359618938732	0	0.793735367365851	0.647065806537155
GSM3942745	0.0263968334354532	0.0115599665138736	0.000854654630830049	0.0269618453597977	0.0963392933587893	0.157950937097221	0.0345053135208031	0	0	0	0.0735164006080738	0	0.147257037453075	0	0	0	0	0.000617427696469352	0.0108042622007695	0	0	0.413236028124844	0	0.80644615314884	0.615506731025518
GSM3942773	0.0208938126348529	0.0130592265512015	0.00203739206533595	0.091095863340947	0.108603022050619	0.113570832460078	0.0269689541502674	0	0	0	0.130904079749039	0	0.102265498930051	0	0	0	0	0.000665521228140724	0.0192128582766074	0	0	0.37072293856286	0	0.80634144105568	0.626530912479412
GSM3942774	0.0325805491477903	0.00429605987727572	0.00621366748012382	0.0715202266788855	0.0633780761671249	0.146895240191991	0.0295964056078949	0	0	0	0.13404484266741	0	0.213430955448011	0.0148123594414248	0	0	0	0	0	0	0	0.283231617292068	0	0.773959451058397	0.668385892532481
GSM3942775	0.0201793281244184	0.0150121825225546	0.00445980729244767	0.112358028820937	0.0411323073485051	0.125137814592373	0.0221333395361517	0	0	0	0.106478833686863	0	0.134319946142029	0	0	0	0	0.00407043579220027	0.0118046669096773	0	0	0.402913309231843	0	0.807365506991223	0.616767617225273
GSM3942776	0.019997348785729	0.00520076244326272	0.00680563744789141	0.0645653786074614	0.116085382746428	0.0635567323752905	0.0225514536004664	0	0	0	0.0845935648652173	0	0.166882665674999	0.016593028100105	0	0	0	0.00448324413528784	0.00840231510622693	0	0	0.420282486111634	0	0.80107555885414	0.617640506822913
GSM3942777	0.0324727821251911	0.00422621773881079	0.0043709612470061	0.0617848981072941	0.143954275659639	0.0605069923261941	0.0193613915623677	0	0	0	0.0674328810893943	0	0.232417406001236	0.0088257860477037	0	0	0	0.00565519905543161	0.00924874964395173	0	0	0.34974245939578	0	0.831126985799802	0.598869194328608
GSM3942778	0.00174448304538537	0.00316549156901191	0.0120454779444267	0.0434849687163678	0.0989976139452804	0.0792840330696525	0.0408642627032518	0	0	0	0.11997708667465	0	0.181350925346396	0.0235513089640571	0	0	0	0	0.000683836677088436	0	0	0.394850511344431	0	0.7984332827562	0.624056493323253
GSM3942779	0.0146321362875574	0.00526140194766937	0.00684719525552763	0.172341738113005	0.016064542673025	0.105690554703915	0.028142351834989	0	0	0	0.128059881778779	0	0.135061092198903	0.0213810089902456	0	0	0	0	0.00439717508537659	0	0	0.362120921131007	0	0.810151845673953	0.620596018184981
GSM3942780	0.0127214262904838	0	0.0064650085690035	0.0235134234325202	0.124643793349837	0.0516529510788417	0.0432146529422133	0	0	0	0.212749358766299	0	0.158761281403462	0	0	0	0	0.00116236526786568	0.032609405020142	0	0	0.332506333879331	0	0.815203047882226	0.621518263144147
GSM3942781	0.0180211767114405	0.0149516508962042	0.00363995532166162	0.0854684811410389	0.0978895315070397	0.0703915269635462	0.033245258516793	0	0	0	0.08915525710146	0	0.134947648082811	0	0	0	0	0.00236558259268629	0.0220499786792043	0	0	0.427873952486114	0	0.822758404853804	0.595890375983165
GSM3942782	0.0269159397955009	0	0.00608317132543541	0.0530018385780351	0.0612863351956947	0.14020783653386	0.028135674291329	0	0	0	0.106342856168952	0	0.1980439852194	0	0	0	0	0.00174254923876738	0.00218457408321744	0	0	0.376055239569808	0	0.799903688478361	0.625889190946315
GSM3942783	0.0186209062702802	0.00015145938924427	0.00943968871530862	0.0517280141273627	0.127953199610979	0.0580862700203603	0.0104291948713754	0	0.00379647566024153	0	0.0684617685825853	0	0.210505016760268	0.000973856745448337	0	0	0	0	0.0200046099312833	0	0	0.419849539315264	0	0.79432089875444	0.62181748322479
GSM3942813	0.0141098463661482	0.000795385873259754	0.0054632546688797	0.271574629543296	0	0.0632195812690458	0.0119224922611633	0	0	0	0.15657474449215	0	0.1502001058397	0.0145264454021714	0	0	0	0.00106129981926701	0.0114701107028107	0	0	0.299082103762108	0	0.801643622836312	0.635132731100025
GSM3942814	0.00793361220572442	0.0315416375236191	0.00181193122893414	0.146375791477807	0.0945503080695563	0.109765789314279	0.0478847272140801	0	0	0	0.102325466611784	0	0.148398	0.00438185989789998	0	0	0	0	0	0	0	0.305031339808316	0	0.794327109606644	0.649709273579113
GSM3942815	0.0472023493413008	0	0.00497957100194624	0.082543466443144	0.0835595796447086	0.16786804252733	0.0171661366340095	0	0	0	0.181348025844358	0	0.246237202085173	0.00641933266007609	0.000128149160343709	0	0	0	0.0218704174849203	0	0	0.14067772717269	0	0.762103855123564	0.698628970878078
GSM3942816	0.0256756252913985	0.000829313719819348	0.00485176739773322	0.0842883184554532	0.0678275967814086	0.154540819780085	0.02230904753285	0	0	0	0.0914604452352517	0	0.193547490348433	0.00696015281866468	0	0	0	0.00130186572744827	0.0132549001468916	0	0	0.333152656764563	0	0.800953435448939	0.635911877669269
GSM3942817	0.0296397339759565	0.00378983244028466	0.00857073764070914	0.0987817933573438	0.106809314926709	0.0944932966237121	0.00512207637598109	0	0	0	0.0980087645052753	0	0.145316565766093	0.00551426886658507	0	0	0	0.0010794574899228	0.00684624621900535	0	0	0.396027911812422	0	0.801221854789581	0.623123090115892
GSM3942818	0	0.00486812895711618	0.0124563072029183	0.0440664715974994	0.133031670506032	0.0474860847528301	0.0076836809920503	0	0	0	0.127685424274312	0	0.187466764831793	0.0139569750456203	0	0	0	0	0.0222297648570596	0	0	0.399068726982769	0	0.815773275662508	0.604431062671812
GSM3942819	0.0348959836859268	0.00343541232682233	0.00351939373976432	0.118234978563068	0.149595444958209	0.0868379200559214	0.0218822384205146	0	0	0	0.0823538525638154	0	0.163514562078846	0	0	0	0	0	0.0121510483842632	0	0	0.32357916522285	0	0.797057992824683	0.64268889161623
GSM3942820	0.0129963697025699	0.00390315823790819	0.00436746003784182	0.175234795095121	0.0378974752081696	0.0790279228396556	0.0319189917676752	0	0	0	0.167101356021122	0	0.171253102747809	0	0	0	0	0.000830285975963488	0.0118141295976769	0	0	0.303654952768488	0	0.793979355722451	0.643786186447126
GSM3942821	0.0155361109208047	0.00559528925847129	0.00485571749047343	0.114415059332464	0.0648259449145293	0.0846004992798261	0.0365634502744705	0	0	0	0.119784420611546	0	0.15659630097045	0.00460151087384009	0	0	0	0	0.0067369816257115	0	0	0.385888714447412	0	0.818254627186314	0.60716290522359
GSM3942822	0.0360999149651983	0.0118320913645142	0.00401035750994214	0.0804873464798609	0.147272464262756	0.127272464073029	0.0244216337802056	0	0	0	0.10421978095992	0	0.205365513093189	0.000308503414082279	0	0	0	0	0.0145495676974034	0	0	0.244160362399899	0	0.788622796970153	0.666756963711186
GSM3942823	0.00267105857839135	0.0201588528191384	0.00430424131032358	0.221599555265384	0	0.0386814284836358	0.0441227882142442	0	0	0	0.166915703148372	0	0.148000797768682	0.0019684207099397	0	0	0	0	0.0187388116166131	0	0	0.332838342085277	0	0.800326259974566	0.632669263026429
GSM3942824	0.0178267062077375	0	0.00397712772803411	0.0826205099694183	0.0877561363743598	0.109791907569726	0.0377023673211738	0	0	0	0.100650477063873	0	0.203086979368252	0	0	0	0	0.00087365088357354	0.0187844031878205	0	0	0.336929734326031	0	0.827747802814472	0.60909876128854
GSM3942825	0.0226545929312267	0	0.0054985082466524	0.250838146548368	0.027179102643851	0.0334867693756943	0.0315886809534258	0	0	0	0.13256287649605	0	0.141233228170797	0.00482519268501316	0	0	0	0	0.0113875023430475	0	0	0.338745399605873	0	0.79489982682815	0.637596036088725
GSM3942887	0.0251455327364102	0.00210234599129792	0.00306970841546397	0.162908827669136	0.0449691226459342	0.0699318449817821	0.0377310816834732	0	0	0	0.124798239885569	0	0.161963508151092	0.00376396404140619	0	0	0	0.000533894071116415	0.00894146502655531	0	0	0.354140464700764	0	0.809165932947739	0.622643168478411
GSM3942888	0.00992675667845155	0.00230900078538893	0.0121797446067977	0.0498468551807504	0.112161823563178	0.12520893414994	0.033138629845379	0	0	0	0.0923282165463798	0	0.163903415712295	0.0316600848314393	0	0	0	0	0.00386300176914421	0	0	0.363473536330855	0	0.817449384550521	0.61512525388898
GSM3942889	0.00824928633917156	0	0.0145490605009555	0.0546626476418225	0.0852147301434932	0	0	0	0	0	0.0946534912830314	0	0.195901345198398	0.0181274290022827	0	0	0	0.00163345274680588	0.0142831514250356	0	0	0.512725405719003	0	0.828677896642417	0.566543206052938
GSM3942890	0.0263456989188431	0.00127514849135194	0.00572529150758333	0.109173744610807	0.0695578754501022	0.0625033619871861	0.0241511316459302	0	0	0	0.102445206372584	0	0.163094810404784	0.0173550957367555	0	0	0	0.000886537547807498	0.0145080921273316	0	0	0.402978005198933	0	0.809913262665636	0.612213006588319
GSM3942891	0.0281039361818897	0.009821196903629	0.00558874489636983	0.149140158461635	0.0766232076444573	0.0304100229318458	0.0248427314623131	0	0.000321108798982401	0	0.141797823437699	0	0.186818412607411	0.0129470395952656	0	0	0	0.000400800924093326	0.0165057857849864	0	0	0.316679030369423	0	0.796849612695275	0.64177074294639
GSM3942892	0.0134434748464392	0.00516554885637352	0.00486474166474168	0.0765808566777326	0.0747338125713775	0.049389679294816	0.00704749870022581	0	0	0	0.0991064238094371	0	0.132376903023448	0.0377022795810224	0	0	0	0	0.0052562912465767	0	0	0.494332489727809	0	0.849983538370721	0.54539925798131
GSM3942893	0.0159025152865383	0	0.00878179361991289	0.0772270765344046	0.0864266626951341	0.0558578182860023	0.0180746446302236	0	0	0	0.0841291513565478	0	0.150095686422096	0.025233399209569	0	0	0	0	0.0116825420586908	0	0	0.466588709900881	0	0.829110361125298	0.577235320012312
GSM3942894	0.0318169130771926	0	0.00860134398356861	0.0828648530528075	0.122619600149127	0.127927183989628	0.0172296422768795	0	0	0	0.101967565979854	0	0.1055007865504	0.00294041261036162	0	0	0	0	0	0	0	0.398531698330181	0	0.804199045311177	0.621501662226069
GSM3942895	0.0242558906187389	0	0.00235863362464086	0.150474319365074	0	0.0491036127034576	0.0264711262468431	0	0	0	0.134147695699146	0	0.172717786253367	0.0352972714290087	0	0	0	0	0.0117682908435447	0	0	0.393405373216179	0	0.822969224808178	0.597489785769172
GSM3942896	0.00488178221036461	0.0252309982644154	0.00279801889424754	0.120997475025878	0.0763272929467499	0.0989138434050921	0.0400760176941401	0	0	0	0.107705920582793	0	0.192278774237163	0	0	0	0	0	0.0144327738527215	0	0	0.316357102886436	0	0.80253554766594	0.638339264174554
GSM3942897	0.0147735675636228	0.0030271537320746	0.0112089116007964	0.0913358898568988	0.0960533958552781	0.0542836742381278	0.0221025582419696	0	0	0	0.05548409621779	0	0.227294887738723	0.0147835527628861	0	0	0	0	0.0178658923349423	0	0	0.391786419856891	0	0.822492594949123	0.596826611902303
GSM3942898	0.0358734145615121	0	0.00645088847205727	0.0919906153014281	0.123315110976599	0.06651361066654	0.0243579466151872	0	0.000355358540250902	0	0.0936332236567252	0	0.146417575479734	0.00224604945722232	0	0	0	0	0.0166368530677132	0	0	0.392209353205031	0	0.814569553604567	0.611757750307956
GSM3942899	0.0286933290432589	0.000661651081179511	0.00523228330473369	0.0868886681836717	0.067729030736953	0.140613217478939	0.0234060819226791	0	0	0	0.160805479297821	0	0.13484719086779	0	0	0	0	0.0010852267469195	0.00663485966757808	0	0	0.343402981668476	0	0.814073492237314	0.621453070970416
GSM3942900	0.0313210167132064	0	0.0074815049208362	0.038600369738435	0.113098209023833	0.111089020880927	0.0313803142338186	0	0	0	0.0976834409832727	0	0.137343026419756	0.0328150006022453	0	0	0	0	0.0106661277446423	0	0	0.388521968739028	0	0.805420199189967	0.623153811870666
GSM3942901	0.0280293246519336	0.0112449650702137	0.00296837117844845	0.107444156479959	0.0776960870245884	0.0991286942873085	0.0336498857109268	0	0	0	0.0773371144477938	0	0.185588135343924	0	0	0	0	0.000237827680428558	0.0136139111496338	0	0	0.363061526974841	0	0.811327222134863	0.61975392804382
GSM3942902	0.0654527530298265	0	0.00692374724362149	0.0410636752199212	0.0922081816065976	0.177673365881622	0.018399538649544	0	0	0	0.0918800117326173	0	0.177936551260193	0	0	0	0	0	0	0	0	0.328462175376058	0	0.821448095884194	0.619665076453163
GSM3942903	0.0134723288858482	0.00965944637677724	0.00529124728231998	0.104218485370561	0.0602210257424943	0.056247275403883	0.0307760498732222	0	0	0	0.0842062030056217	0	0.192140257693752	0	0	0	0	0	0.0231429550208198	0	0	0.420624725344701	0	0.82668066471301	0.588317577002775
GSM3942904	0.0107541232219186	0.00682211959497909	0.00885662141865291	0.0504365135538376	0.0924501267335187	0.130625383508125	0.0199221005514314	0	0	0	0.0838425389188398	0	0.159526230184104	0.0170785540692203	0	0	0	0	0.010959756339098	0	0	0.408725931906275	0	0.827783269069277	0.592547286681224
GSM3942945	0.0237393081436736	0.00647701247528708	0.0038504612614851	0.0914903669012901	0.0399428204654273	0.144652995783547	0.0327380696229803	0	0	0	0.102428889663621	0	0.185671904082163	0	0	0	0	0.00181809718571568	0.00624987770328676	0	0	0.360940196711523	0	0.81258803234734	0.618080280069218
GSM3942946	0.0248257053730792	0	0.00848671586065948	0.0412484347419522	0.103779231385541	0.0803906231707871	0.00344775624407723	0	0.00164555285132967	0	0.0974077644230575	0	0.192805407049245	0	0	0	0	0	0.0212761074392637	0	0	0.424686701461008	0	0.823315967186862	0.590516284171119
GSM3942947	0.0534494800966554	0	0.00151265752661898	0.164183573029265	0.0461964489218141	0.104572619943607	0.0212158307491897	0	0	0	0.120027974624222	0	0.185109102409058	0.00860874891729075	0	0	0	0	0.0149868506412658	0	0	0.280136713141014	0	0.807206701085338	0.641919621691985
GSM3942948	0.0396229928787048	0	0.00520968042665477	0.0634830538864055	0.0684933750239108	0.159930106532349	0.0411624164099932	0	0	0	0.139757644214069	0	0.197984213068408	0	0	0	0	0	0.0179749858699194	0	0	0.266381531689586	0	0.789679333420874	0.661805851591474
GSM3942949	0.0197682749786194	0.0208134481915217	0.00513915197647001	0.0976124618537763	0.11210608924973	0.108540919069894	0.0230271275636515	0	0	0	0.105464742099776	0	0.13383151391652	0.0239873007424721	0	0	0	0	0	0	0	0.349708970357569	0	0.785447816203299	0.64925235919657
GSM3942950	0.019904885815383	0.00118402698526814	0.00885203286128091	0.0642869442401481	0.0516442696640006	0.139472049339765	0.0397595551390219	0	0	0	0.121044768316708	0	0.200042021183739	0.00936077232399204	0	0	0	0	0.00937655034760179	0	0	0.335072123783091	0	0.774315707135847	0.659192822481435
GSM3942951	0.0250043120270951	0	0.00794445147106972	0.144206554615681	0.0143370942461204	0.140850310847051	0.0103750467397716	0	0	0	0.179536836075454	0	0.183538196184563	0	0	0	0	0	0.00941388924512774	0	0	0.284793308548066	0	0.781306218739166	0.65750767622533
GSM3942952	0.0392901071045743	0	0.00938481677467971	0.12381780485821	0.0664562088018748	0.0779135376718011	0.0328490446199518	0	0	0	0.131341875238654	0	0.139362301985273	0	0	0	0	0.00150795727808234	0.00852542657522242	0	0	0.369550919091676	0	0.799345587630959	0.631322254989119
GSM3942953	0.0270811267864552	0	0.00637289517888032	0.231359745371503	0.0787155790230671	0.0541153972160759	0.0330374078607238	0	0	0	0.110021954981245	0	0.149666651747762	3.38065609439601e-05	0	0	0	0	0.015463959936325	0	0	0.294131475337019	0	0.777586032687585	0.663599041233217
GSM3942954	0.0132450004952254	0	0.00612223369817057	0.149182300824428	0.0620338130110865	0.106056753950471	0.0149252317357965	0	0.00217611200712195	0	0.0947877324316967	0	0.18657014749075	0	0	0	0	0	0.00341684254190005	0	0	0.361483831813354	0	0.795627950270851	0.632015701100068
GSM3942955	0.0363747949181909	0	0.002629473853345	0.19700769447722	0.0360083419070385	0.0548513571199194	0.0150390479973843	0	0	0	0.142434464241841	0	0.19202061731386	0.0245569903643475	0	0	0	0	0.0114270659353532	0	0	0.2876501518715	0	0.812735721578014	0.631243425306812
GSM3942956	0.0255382701897021	0.00375999447273976	0.00382847000563189	0.146847900285279	0.0283055244671607	0.13751603010714	0.0341381634834538	0	0	0	0.12427609178418	0	0.13437049531188	0	0	0	0	0.00149923235479737	0.00666544357435445	0	0	0.353254383963681	0	0.812125729941956	0.621798445208841
GSM3942957	0.00554290961386124	0.0128825558274175	0.00450556202924667	0.257156793198739	0.0480467636903436	0.0585493327700101	0.0173810495602797	0	0	0	0.150899729616022	0	0.144712175619504	0	0	0	0	0	0.0107662948838082	0	0	0.289556833190767	0	0.774909244679972	0.661629707670452
GSM3942958	0.0165572080519722	0.00703574674781484	0.0058428393955487	0.0559037892401772	0.116240880816263	0.0628429733652538	0.0412745318442294	0	0	0	0.0975419740728145	0	0.186216469580229	0.00124489507401373	0	0	0	0	0.0177664215201727	0	0	0.391532270291511	0	0.809652422180337	0.614443619440468
GSM3942959	0.00882833321096931	0.0162170090094538	0.0061455549329682	0.0896357254946814	0.0871481597045141	0.138633910326534	0.0379156453274871	0	0	0	0.123813165314933	0	0.172460943601013	0	0	0	0	0	0.0171156063926056	0	0	0.302085946684841	0	0.793532704508928	0.651193439278047
GSM3942960	0.0464014548851933	0.0304758280036937	0	0.112385923873551	0.0947482295744141	0.105257404138289	0.0282507936372951	0	0	0	0.106134135272962	0	0.184387634227396	0.0099212655604286	0	0	0	0	0.0109946298224736	0	0	0.271042701004304	0	0.776880487262006	0.672361829138933
GSM3942961	0.0609323086546731	0	0.000644417801600656	0.102962619397735	0.0565051562494285	0.10496189100893	0.0212997934511606	0	0	0	0.0930288950455063	0	0.1891616611845	0	0	0	0	0	0.0125020976857031	0	0	0.358001159520763	0	0.809356903258204	0.622200923058358
GSM3942962	0.0296463547907083	0.00691117502074406	0.00981909842077171	0.138529759974649	0.0648322565480041	0.0795786350244707	0	0	0	0	0.128396598129696	0	0.150564877723816	0	0	0	0	0.00112303370288254	0.00548556302657895	0	0	0.385112647637679	0	0.793306226365407	0.631634003325876
GSM3942963	0.0174647277952391	0.0202854866854514	0.00271299374456897	0.151527809138302	0.0523145080121477	0.103193283644131	0.0288218215868112	0	0	0	0.122456330449282	0	0.138606565702572	0	0	0	0	0.00121160697069496	0.00495435472531008	0	0	0.356450511545489	0	0.795608466107486	0.636522668950855
GSM3942964	0.0231058032694745	0.0111382647667199	0.00416976795920656	0.165617415714311	0.0299296233977951	0.0811299374851231	0.0290494432244065	0	0	0	0.172822809877401	0	0.137359152688262	0.00976590347574201	0	0	0	0	0.000340335789784882	0	0	0.335571542351773	0	0.787801035329399	0.644691423826378
GSM3942965	0.0429929011273013	0	0.0127409761641895	0.0757015132264868	0.117065647473461	0.104381131613855	0.0154744164288322	0	0	0	0.105638384790131	0	0.140708765020596	0.0128507107609163	0	0	0	0.0045231054263355	0.00687847780112338	0	0	0.361043970166772	0	0.781524839817335	0.651241996186088
GSM3942966	0.0243317814438371	0.00346407816346512	0.00707216424660312	0.111581797435899	0.057449054116605	0.0762548583327646	0.0239872998940356	0	0	0	0.126576078690738	0	0.158972275383216	0	0	0	0	0.000569979165936516	0.017873628820307	0	0	0.391867004306593	0	0.815310215752916	0.609002742981358
GSM3942967	0.021794995000467	3.34492868259685e-05	0.00839314362992766	0.104191219097434	0.106104623299051	0.0902273263523611	0.0224242772260616	0	0	0	0.0934095785665529	0	0.111121749310205	0.00091897534053044	0	0	0	0	0.0207114845160734	0	0	0.420669178374509	0	0.813985291862457	0.60749774843088
GSM3942968	0.0136926163091608	6.35898812097375e-05	0.0109305790169102	0.151679457547428	0.0769554086174842	0.0657090379964007	0.0189277714996617	0	0	0	0.115196898337932	0	0.145582507894916	0.00679765241101296	0	0	0	9.91823763310476e-05	0.00693760365845406	0	0	0.387427694453098	0	0.80193009706142	0.623095537686603
GSM3942969	0	0.0141335080400935	0.00402437361622696	0.111431483888925	0.0475125900231692	0.0115735739456781	0.0196272363246621	0	0	0	0.169244175883604	0	0.15491580805809	0	0	0	0	0	0.0185883201611839	0	0	0.448948930058368	0	0.823557847832088	0.584727657354149
GSM3942970	0.0419914276008247	0	0.0089992333031824	0.0725325711861554	0.0673049373845171	0.0607797185871867	0.0164467034074957	0	0	0	0.114514876477052	0	0.145123924490416	0.00510022317994303	0	0	0	0	0.00957074930907932	0	0	0.457635635074147	0	0.805715920082838	0.606636077552622
GSM3942971	0.0233907877374165	0.00745560938864174	0.00855238402213297	0.0507079355383534	0.119507756219189	0.112487697505736	0.00997189255071479	0	0	0	0.13054732577632	0	0.100243554958325	0	0	0	0	0	0	0	0	0.43713505630317	0	0.813920887328042	0.60301984426643
GSM3942972	0.0570967392522335	0	0.00227715861260365	0.128003052520654	0.0973339266099171	0.107788887644587	0.0213956579897195	0	0	0	0.148004818344138	0	0.146016024706252	0.00381121378241342	0	0	0	0.000287729446250452	0.0204363859830466	0	0	0.267548405108184	0	0.784971433083275	0.665196993030451
GSM3942706	0	0.00451599680688269	0.013958901828185	0.0166593332924401	0.010569177816419	0.0466407266029537	0.0641373777618212	0	0	0.00924272231934951	0.104988787427342	0	0.193851540455522	0.0125774207264031	0.000947335555662228	0	0	0.00434822669319329	0.00352810519241968	0	0	0.514034347521406	0	0.723733450303918	0.691453429215142
GSM3942707	0	0	0.00645704685411859	0	0.0976526804184592	0	0.0300647993144506	0	0	0.00326225950056842	0.10732227739788	0	0.228175114163452	0.0389098830743355	0	0	0	0	0.00342778355164824	0	0	0.484728155725087	0	0.651847413683312	0.763728279268133
GSM3942710	0.0353734910849526	0	0.0208342493524568	0.0293754490596593	0.0341171885733516	0	0.0148643629674015	0	0.00670153167336739	0	0.0808610610754706	0	0.293819464075459	0.0576474695396961	0	0	0	0	0.00864082249227811	0	0	0.417764910105907	0	0.624820709199949	0.784276349048947
GSM3942711	0	0.00425569105344143	0.00414707035899843	0.033958922643431	0.0462266559158151	0	0.0148015380079132	0	0.00235748867594255	0	0.0517964104420365	0	0.270272755292746	0.0355302871163633	0	0	0	0	0.0213454705503972	0	0	0.515307709942915	0	0.65201311487193	0.770565064924711
GSM3942713	0.0355116107464072	0	0.0180979575648916	0.0361035778184001	0.0393307052934722	0	0.0226935520640783	0	0	0.0699436966691358	0.0818343144029955	0	0.184714226410375	0.043641294771684	0	0	0	0	0	0.00217671294766065	0.00193808241764415	0.464014268893255	0	0.683201160234754	0.731413555022183
GSM3942714	0.0419071647437028	0	0.00622809853968336	0.0259856657939084	0.0715277387992648	0	0.0143485543089947	0	0.00870143085576092	0	0.0786002763099394	0	0.186385031810496	0.0500482657604222	0	0	0	0	0.000234303173320818	0	0	0.516033469904506	0	0.577877209944457	0.835579393446449
GSM3942715	0.017600531354976	0	0.00912998955273733	0.0228895949954722	0.0458240059223014	0	0.0361675420715517	0	0	0.0341167811788779	0.0687883185643399	0	0.356991961090101	0.0426122991070087	0	0	0	9.65897525223912e-05	0.00153938642655693	0	0	0.364242999983555	0	0.60982732822437	0.795124882017922
GSM3942716	0.00180939242305184	0	0.0124141404530512	0.00831419197107117	0.0445100110149022	0	0.0128905335594394	0	0	0.00627764500406385	0.0613495173171828	0	0.118109096998604	0.00602460261683228	0	0	0	0.00132293636147484	0.00808791486019703	0	0	0.71889001742013	0	0.804065984663272	0.614433589712951
GSM3942717	0.0520669499689123	0	0.00725709852965129	0.0352049358464758	0.0734700260004382	0	0.0246683498642444	0	0	0	0.105984465943689	0	0.205403169332115	0.0557370602950173	0	0	0	0	0.000200944447513862	0	0	0.440006999771942	0	0.611661766829044	0.794847935687098
GSM3942718	0.0324967286728725	0	0.0129069986441948	0.030887912843152	0.0543249483639269	0	0.0266525531968222	0	0.00162865879593016	0	0.0749113446991809	0	0.190990618190546	0.0263555925147201	0	0	0	0	0.0208097297265125	0	0	0.528034914352141	0	0.636950382837796	0.781817086257639
GSM3942719	0.031732722762824	0	0.023951694624185	0.0403319613754813	0.0870412060848484	0	0.0159343759744535	0	0.00568247158655082	0	0.0569994635909096	0	0.199337397971985	0.0390730449065745	0	0.0116227484134765	0	0	0.0270221036533214	0	0.006888864260907	0.454381944794482	0	0.577730592867059	0.824052332317728
GSM3942720	0.0120666555241412	0	0.014104320417971	0.0212864108585201	0.0715482595021725	0	0.0170968097238653	0	0	0	0.0594768094597581	0	0.190635111904584	0.0151069173851355	0	0	0	0.00124995726094628	0.0101259822380266	0	0	0.587302765724879	0	0.718996156315192	0.704598949820276
GSM3942721	0	0	0.0143420849907913	0.010201391892207	0.0609063130079376	0	0.028165475103346	0	0	0.0294494889394059	0.0762249229915451	0	0.168480145241237	0.0315194434930404	0	0	0	0	0	0	0	0.580710734340489	0	0.614208989300753	0.815484572412628
GSM3942722	0.031118774754238	0	0.0112367911183217	0.0359871721584774	0.0635510363427271	0	0.0164904945281154	0	0	0.00184629857977693	0.0601470672796672	0	0.242722635729885	0.0392189605852643	0	0	0	0	0.0160158924397112	0	0	0.481664876483816	0	0.66756538800436	0.748299061212042
GSM3942724	0.0417847190784654	0	0.0172067171014694	0	0.0921432740759056	0	0.0143213374664666	0	0	0.027106924422902	0.0927315375386178	0	0.324973488343318	0.0742141716082767	0	0	0	0	0.0150115646037905	0	0.0186916175187521	0.281814648242036	0	0.538202014896699	0.843887634771199
GSM3942725	0.0443893650221571	0	0.0175499960115347	0.0320213551622174	0.0671302914952937	0	0.0127113992868595	0	0.00428319257576347	0	0.0694271222188531	0	0.265247152799044	0.0343686600915266	0	0.00129669751723369	0	0	0.0244531857343665	0	0	0.42712158208515	0	0.631397502694225	0.77772585888101
GSM3942727	0.00880414620320514	0.00638224392681845	0.0100748324099054	0.0132763121312001	0.05203747551288	0	0.0219119586848722	0	0	0.0119917952456285	0.0525040381890923	0	0.263976379082311	0.0182235741406321	0	0	0	0.00111528286594002	0.0157257750734009	0	0	0.523976186534114	0	0.596186021817023	0.82646612677106
GSM3942728	0.0324585506573214	0	0.0162973818576132	0.0397093653997217	0.0275077746752777	0	0.0215525842837839	0	0	0	0.0749644410488842	0	0.0768029150315809	0.035276558918093	0	0.00412618930546432	0	0	0.00659523189805626	0	0	0.664709006924203	0	0.762291648204367	0.659296391536087
GSM3942729	0	0.00949468394673912	0.0100417173362688	0.0261718109167784	0.0538056203107986	0	0.021294465116772	0	0	0.00429247331309233	0.0804950871794419	0	0.204454652044277	0.0335898981321064	0	0	0	0	0.00551000369497952	0	0	0.550849588008746	0	0.629581976767912	0.795498131440165
GSM3942730	0.0353096685442926	0	0.0183604458227786	0.0420422912288036	0.0750568517046087	0	0.0159755796712218	0	0.00130907119080676	0	0.0776271461106028	0	0.21245969134335	0.0343193789612925	0	0	0	0	0.00804925205756647	0	0	0.479490623364676	0	0.59809701691811	0.811436585751542
GSM3942731	0.0651746638007315	0	0.0172802430909501	0.0420541184503853	0.0472256479624394	0	0.0218547643946683	0	0.0106134975886838	0.0245627433502036	0.0407761416477217	0	0.315387924640105	0.0285348789019769	0	0	0	0	0.0114173762931987	0	0	0.375117999878935	0	0.604497140740258	0.798547631653617
GSM3942746	0.0110624589774005	0	0.00904124541792401	0.0055992502587312	0.0419031943488758	0	0.0228168810032526	0	0	0	0.0572171422636013	0	0.459931723667874	0.0341238219175688	0	0	0	0	0.0258217974431004	0	0	0.332482484701671	0	0.774961321133496	0.636059974173291
GSM3942747	0.0399007690382069	0	0.0099342486938543	0	0.0324395613810095	0	0.0190412373870291	0	0.0109848050545371	0.0106312926378332	0.0796439056984816	0	0.410672265542468	0.0890451378514078	0	0	0	0	0	0.0228432333505078	0	0.274863543364664	0	0.573627403256298	0.820382312004671
GSM3942748	0.0218887347852858	0	0.0110405897368998	0.0403555410398047	0.0389440961762973	0.0230067973280963	0.0188294582559726	0	0	0	0.0783786474206288	0	0.203049587468929	0.0162723229916421	0	0	0	0	0.0108220990530332	0	0	0.53741212574341	0	0.837557708203723	0.551492023614505
GSM3942749	0.055669756117255	0	0.0048656687959113	0.108245099704376	0.0290365335683809	0	0.0386847726500583	0	0	0	0.124952282248246	0	0.194698562884324	0.0326316264486656	0	0	0	0	0	0	0	0.411215697582783	0	0.717821804841299	0.699348020684519
GSM3942750	0.0219575451964941	0	0.00340453128605751	0.0376975968196484	0.0582122957516826	0	0.0190008941895009	0	0.00354823277246906	0	0.061428910092153	0	0.230540870649824	0.0488151947178232	0	0	0	0	0.0157131030525054	0	0	0.499680825471842	0	0.648869296882413	0.768577351605987
GSM3942751	0.00757979044733653	0	0.0124944503360559	0.0129907097364534	0.065290575318748	0	0.0136682113011357	0	0	0	0.0711379799648102	0	0.274538426366668	0.0144972914569892	0	0	0	0.000700356258950189	0.017462948243083	0	0	0.509639260569769	0	0.676152931092181	0.744528661818908
GSM3942752	0.0187269671340641	0	0.037325608137287	0.0931236353201298	0.0487924486168501	0	0.0299388026195788	0	0	0	0.164929134207681	0	0.224469045278161	0.0404426769702682	0	0	0	0	0.00996974004848881	0	0.0361761950075575	0.296105746659934	0	0.502994961133665	0.866628367530665
GSM3942753	0.00903482821202061	0	0.0135750707604866	0	0.0664328814707564	0	0.0124050823840155	0	0	0.030690653898737	0.0539056423863262	0	0.305832814315561	0.00075682058240115	0	0	0	0.0129098061832267	0.0168383951319525	0	0	0.477618004674517	0	0.743435784426238	0.669571045276671
GSM3942754	0.0577108661904842	0	0.0128817563444253	0.0317393141110221	0.0564214721038082	0	0.0235506190367823	0	0.00364354835631692	0	0.0621443494883167	0	0.29663536729201	0.0364862743496023	0	0	0	0.000390826168449672	0.012420317043368	0	0	0.405975289515414	0	0.642606064626994	0.76723810073901
GSM3942755	0.0493115909288904	0	0.0176910601687781	0.0366966769097529	0.0415893636562279	0	0.0200704816849902	0	0.00933871103953005	0	0.0739732192452881	0	0.17134334570159	0.0286557842705486	0	0	0	0	0.0155277417427247	0	0.00836405076660522	0.527437973885073	0	0.642186273750733	0.775894324282096
GSM3942757	0.0168144913474938	0	0.0106016503042606	0.0791286691738306	0.0182662050049633	0.0264980590573357	0.0169162821441378	0	0	0.00976998879109063	0.0977779550087836	0	0.167822993340074	0.0312219715668272	0	0	0	0.00551542919288347	0.00328263565697003	0	0	0.516383669411349	0	0.777118952322563	0.63163640989377
GSM3942759	0.0586073851663762	0	0.014553505312149	0.0263186077108343	0.0640991171122693	0	0.0169314405969888	0	0.00274319525227973	0	0.0823585447815271	0	0.296208069710671	0.0552854104986239	0	0	0	0	0.00346435616707777	0	0	0.379430367691203	0	0.633419378517568	0.774149172012182
GSM3942760	0.0445046631304278	0	0.0203615503354192	0.052545646810655	0.056613114585817	0	0.0406419411911351	0	0	0.0619455816889698	0.0863335493095323	0	0.0862118666133722	0.0362215611007524	0	0.00858184033191076	0	0	0	0.00459093432480141	0	0.501447750577207	0	0.637648512592869	0.774583323988172
GSM3942761	0.0195248243636222	0	0.0244595364655274	0.0440321971216333	0.0721710778434277	0	5.65522382013843e-05	0	0.00267472314288779	0.00436133287184443	0.0685898335325212	0	0.153847093814749	0.043842239815261	0	0.00602324637755846	0	0	0	0.0562383340279921	0.0138525278554865	0.490326480529287	0	0.551331985934245	0.851216156115385
GSM3942762	0.0345200171755524	0	0.023984693342808	0	0.0705267267707445	0	0.000109200431619919	0	0.0150520828622672	0.0250485036719128	0.0639889348108491	0	0.212112057297766	0.0732044949966135	0.0014103638115761	0	0	0	0	0.0700067422407046	0.16257389263408	0.247462289953506	0	0.528640175289022	0.848489623266329
GSM3942763	0.0517809141924645	0	0.0101829081331042	0.0430990106976636	0.0619313841801205	0	0.0199623973337859	0	0.0124273655747003	0	0.11400641116689	0	0.209031621247316	0.0610427273844379	0	0	0	0	0	0	0.0100431348905326	0.406492125198985	0	0.582168838572652	0.816564543764662
GSM3942765	0.122500454695926	0.00468662842958787	0.0122004898760227	0.0356491539448766	0.0221318120202162	0.00598589417193578	0.0393016451327612	0	0	0.0256850540524914	0.0876668896913577	0	0.140239110714819	0.040813894517567	0	0	0	0.000217389465124745	0.0264401919853542	0	0.0729300429849325	0.363551348317028	0	0.462277167931751	0.897483998640104
GSM3942766	0.04161853372718	0	0.0280720404487828	0	0.0496546801458051	0	0.0205245106914349	0	0	0.0210185325747134	0.109972282572275	0	0.307051241560258	0.0588881098088851	0.00130248274078806	0	0	0	0.0008031709423886	0	0.0335808054311694	0.32751360935632	0	0.556183143105889	0.833722046186348
GSM3942767	0.0293719288126297	0	0.0300263584108965	0.0105290880928725	0.0412395374665046	0	0.0142759444583035	0	0	0	0.133222371516266	0	0.279098047188955	0.0728277354797175	0	0	0	0	0.00247707907341836	0	0	0.386931909500437	0	0.515000959302579	0.870757638446247
GSM3942768	0.0456930895910608	0	0.0190867138547308	0.0445767949062432	0.0673799935565071	0	0.019799187444018	0	0	0	0.0715611952459261	0	0.241486946068306	0.0392419807099618	0	0	0	0	0.00892993559878868	0	0	0.442244163024458	0	0.625692208198809	0.783464384291879
GSM3942769	0.030678198975992	0	0.00785319457840133	0.0419235769163095	0.0737916645747826	0	0.0161515279842715	0	0	0	0.0751709879573414	0	0.240688551689664	0.0403019517886171	0	0	0	0	0.0058435337521834	0	0	0.467596811782437	0	0.673429746594384	0.74139340920083
GSM3942770	0.0234472045071531	0	0.0162289161178366	0.0389742541206899	0.063725625170124	0	0.0158009335428053	0	0	0	0.100887379868356	0	0.104803485480129	0.0187670196439351	0	0.00277416658203205	0	0.000527208450758287	0.019956623104849	0	0	0.594107183411332	0	0.779864438173128	0.628784
GSM3942784	0.0147239449707312	0	0.0265327949829969	0.0212288657073467	0.110215996381668	0	0.0207334098328076	0	0.00909248129470586	0	0.160417616232929	0	0.305094212312901	0.120736689669889	0	0	0	0	0.0118527936116518	0	0	0.199371195002373	0	0.482781144207193	0.876056516196118
GSM3942785	0.0681979871896632	0	0.0126707936091181	0.0378965478312298	0.049262029420879	0	0.0242787321783127	0	0.00249178209246365	0.0178401674074154	0.0937854034430108	0	0.225637942191961	0.0385244917631399	0	0	0	0	0	0	0.0272083427104097	0.402205780162396	0	0.542654398048221	0.848155162563186
GSM3942786	0.0228603293150517	0	0.0147223608524747	0.0462557379194829	0.049748202039058	0	0.0549796023091398	0	0	0.0764436517317656	0.102984800303454	0	0.224559972724723	0.0399384199831737	0	0	0	0	0.000974532414946328	0	0	0.366532390406731	0	0.625873150558925	0.779794603578701
GSM3942787	0.0228948396747008	0	0.00863773653787158	0.0328570219714351	0.0465696611757545	0	0.0132058042013197	0	0	0.00858335246435849	0.0686085763541394	0	0.197869180913207	0.0371706014563111	0	0	0	0	0.0096370171453017	0	0	0.553966208105601	0	0.758484172044026	0.654397951108606
GSM3942790	0.0448040102318697	0	0.0213422335844292	0.0272094312249604	0.0620889745895186	0.010591201655376	0.0229001061494124	0	0	0	0.155217739021491	0	0.210958751845092	0.0486769216254753	0	0	0	0	0	0.00858234954715983	0.0168089299309749	0.370819350594241	0	0.544965465462908	0.842442442881953
GSM3942791	0.113812878608523	0	0.0188614178030021	0.0484107157376267	0.0938628843453571	0	0.0743404590287465	0	0	0	0.134013924967473	0	0.196699163611619	0.0960180656485174	0.000368213542142176	0	0	0	0.00086432335062925	0	0.0241647179640124	0.198583235392351	0	0.515074018136217	0.856805409737409
GSM3942792	0.0453157828319363	0	0.0193401827566893	0.0441036809858941	0.0122589929111841	0	0.0309870265058295	0	0	0.0227606318254793	0.11755470957038	0	0.0542270449719557	0.0480132679169515	0	0	0	0	0	0	0	0.6054386797237	0	0.772448185385904	0.639089693893879
GSM3942793	0.0279950291301531	0	0.0122953878754871	0.0317134385298425	0.076426533958851	0	0.0159691919020251	0	0.00580732033401358	0	0.0788546281422853	0	0.327285280704676	0.0619636444631302	0	0	0	0	0.0109897985274465	0	0	0.350699746432089	0	0.543362130343957	0.84569493054485
GSM3942794	0.0194114646502256	0	0.018779152018934	0.0194596167807931	0.0648534497706097	0	0.00729669564912988	0	0	0	0.0752170466365489	0	0.160015661846274	0.0196957220953748	0	0	0	0.0012924564237649	0.00193608154918967	0	0	0.612042652579156	0	0.668221263001903	0.765645637104257
GSM3942796	0.00563108992344131	0	0.0203631581802611	0.0140216268586097	0.0678192356516241	0	0.0151687196052994	0	0	0	0.0911815721876795	0	0.136730784045302	0.015193247844641	0	0	0	0	0.0179095483817641	0	0	0.615981017321377	0	0.66998484744539	0.762329721614431
GSM3942797	0.00309385012825409	0	0.0126899682062391	0.021773421103788	0.0356929411724662	0	0.012751316275522	0	0	0	0.0666930893956467	0	0.133053610206787	0	0	0	0	0.00312057122161043	0.0118546270123479	0	0	0.699276605277339	0	0.78405553824839	0.639995139995822
GSM3942799	0.0145691316561107	0	0.0182439765500781	0.0247530404095172	0.0507888838994758	0	0.0186148938610363	0	0	0	0.105109692065973	0	0.186659572553997	0.0475194537037423	0	0	0	0	0.00289230048451663	0	0	0.530849054815553	0	0.734356416005052	0.680960619850364
GSM3942800	0.00528833488837105	0	0.00862006701105576	0.0855345795136874	0	0	0.0827349781169989	0	0	0.0238275571784091	0.107328158662001	0	0.287686215165736	0.0352291704078947	0	0	0	0	0.031301709333374	0	0.00636764952530948	0.326081580197163	0	0.662525877906779	0.750258102307683
GSM3942802	0.010337978581037	0	0.00950900127662044	0.0193020337936381	0.0470045249580358	0.00807072975491029	0.0150091463390417	0	0	0	0.0596018605623147	0	0.312094618349637	0.0290422454511832	0	0	0	0.00137387652367089	0.0146967122944998	0	0	0.473957272115411	0	0.764123600448683	0.645519783712031
GSM3942804	0.100348080809131	0	0.0213556422513813	0.0324907259845458	0.091319034090134	0	0.0200667030444611	0	0.0136201649446349	0	0.0983443078141391	0	0.333812996432747	0.0817214129679157	0	0	0	0.00260285383881613	0.00418031551782115	0	0	0.200137762304273	0	0.591679217124788	0.807777349413214
GSM3942806	0	0	0.00684967324073277	0.152348381006297	0	0	0.126422954974404	0	0	0.491169320090741	0.0233069602454383	0	0.0725243519052651	0.0121126266839353	0	0	0	0	0.0121941394008623	0	0	0.103071592452324	0	0.778833902892892	0.642794271327809
GSM3942807	0.043345851285088	0	0.010146144883728	0.0256569136191101	0.0426998271590533	0.00227653648030409	0.0220312391782944	0	0	0.0304805534579061	0.0683185381852004	0	0.178068001971963	0.0379036181800544	0	0	0	0	0.00554108490036111	0	0	0.533531690698937	0	0.660121239239069	0.760129077331624
GSM3942808	0.0494270641544431	0	0.0123600618834924	0.0383225227241221	0.0990064495131397	0	0.0177504707240572	0	0.00776970547426875	0	0.106433541463475	0	0.164917769441477	0.066467113350937	0	0	0	0	0	0	0	0.437545301270589	0	0.502135303405052	0.880957865066139
GSM3942809	0.044267519058085	0	0.0154496764120585	0.0338785099798999	0.0484121852548647	0	0.0149989334896529	0	0	0	0.0723926750873133	0	0.138792603974364	0.0535972978100044	0	0	0	0	0	0	0	0.578210598933757	0	0.755420380124284	0.658839614236899
GSM3942810	0.0535705413865457	0	0.0223293161800982	0.0394324696351324	0.0337748422121892	0	0.018666809330593	0	0.00510549094938029	0	0.0673035330862255	0	0.224942586322962	0.0285501195926169	0	0	0	0	0.0178051728025109	0	0.0305611869397969	0.457957931561949	0	0.548935192759965	0.851280109535688
GSM3942811	0.0381199647404385	0	0.021348975994125	0.0483806717936047	0.0792616314660324	0	0.0127233851023399	0	0	0	0.0826298022660788	0	0.14392107251091	0.0410062568181789	0	0	0	0	0.0110280414210071	0	0	0.521580197887284	0	0.701760022829401	0.714572177731617
GSM3942826	0.027414747583064	0	0.00846273422019277	0	0.0473636374767965	0	0.0233442773950522	0	0.00688907613406596	0.0212148160117356	0.0682075150931329	0	0.416224942769451	0.0555479115098611	0	0	0	0	0.00185956081912438	0	0.0141482697298475	0.309322511257676	0	0.647887826453675	0.761239060143155
GSM3942828	0.0325963559275976	0	0.015495594361334	0.0300871975470805	0.0758470072811908	0	0.0236110391249152	0	0	0.03454136777451	0.0866963912218082	0	0.26495748354609	0.0353093621187521	0	0	0	0	0.0139284732292118	0	0	0.38692972786751	0	0.632944687183922	0.774396469712181
GSM3942831	0.0626133819608769	0	0.0207705237463815	0.0276553333565038	0.123680631159489	0	0.0148850443254392	0	0	0.000303510894556672	0.0995065334916921	0	0.26018521853051	0.0884920583531048	0	0	0	0	0.0161258944338808	0	0.0207777056867719	0.265004164060793	0	0.48714715944995	0.874817233833228
GSM3942832	0.00524084932070226	0.000225849069229137	0.015791108050761	0.00309667138588476	0.0500635265262201	0	0.0181952484324236	0	0	0.0224369524331604	0.0920063336060827	0	0.184771424054898	0.0233590525775758	0	0	0	0	0.00332318689944378	0	0	0.581489797643619	0	0.676130589746647	0.752615279110131
GSM3942834	0.0300391503509577	0	0.0120852706515814	0.0414269894246056	0.0461880517808524	0	0.0270086068831714	0	0	0	0.121797425508022	0	0.292380637939162	0.022071207760787	0	0	0	0.00251517144795065	0.00255448735846022	0	0	0.40193300089445	0	0.706296166743536	0.708421209943261
GSM3942837	0.0280826862728866	0	0.019280672641219	0	0.0805366585989317	0	0.0131826442126372	0	0.00910509781202863	0	0.139577864147819	0	0.305575399711831	0.0552614971793659	0	0	0	0	0.000796308310909451	0	0	0.348601171112372	0	0.610130231476088	0.792589831078843
GSM3942838	0.0266731184568177	0	0.0033637954206085	0	0.0558841312393342	0	0.0246781203946291	0	0	0.0620177790062613	0.0245479905357006	0	0.191472936357782	0.00323753643546186	0	0	0	0.00669310395152142	0.0247419074719857	0	0	0.576689580729897	0	0.725128442000394	0.696201786854701
GSM3942839	0.00338249034348434	0	0.0163614441072041	0.0415295688261366	0.0623921551157495	0	0.0185852599633138	0	0	0.0113044177429852	0.0817977657218711	0	0.171764618748805	0	0	0	0	0.000144439324749463	0.013974226748424	0	0	0.578763613357277	0	0.608781341333597	0.819270626334574
GSM3942843	0.0342234293912325	0	0.00842973287111082	0	0.0314188868533477	0	0.0141083639457291	0	0.00994173091753093	0.0322475371320921	0.0567961613486827	0	0.280754201486276	0.0814852793663571	0	0	0	0.00694020562206722	0.00432959943658542	0	0	0.439324871628988	0	0.585477832240398	0.822277983007384
GSM3942847	0.0196316145106536	0	0.010581482698039	0.0380827097986721	0.00263970848982581	0	0.0187656730660962	0	0.00229573003149519	0.0157833503233026	0.0660595822759112	0	0.241117133491407	0.0307623456735836	0	0	0	0	0.016226312031492	0	0	0.538054357609521	0	0.799934728648735	0.601722842757034
GSM3942848	0.0689121265968565	0	0.013371162485456	0	0.0773463753504183	0	0.0166158377925896	0	0.00581029721242503	0.0085736959127707	0.11573692191896	0	0.186265793947087	0.079083775585505	0	0	0	0	0.000253410866719587	0	0	0.428030602331213	0	0.474090403290341	0.902426479303215
GSM3942849	0.0499459112597364	0	0.0227567193128594	0.00692348416820462	0.0611327639275808	0	0.0131788864066507	0	0	0	0.0888759446880136	0	0.186878420243583	0.0546160069846936	0	0	0	0	0.00225959365674846	0	0	0.513432269351929	0	0.628209576753094	0.788592581260975
GSM3942855	0.0271345611871301	0	0.0112878095666972	0.0100937502488076	0.0461152219949785	0	0.0188801681266499	0	0	0	0.06165091446479	0	0.226028263113284	0.0501608989596343	0	0	0	0	0.0130878518985141	0	0	0.535560560439514	0	0.748940598821174	0.665002896536395
GSM3942856	0.0372176666237985	0	0.0197287817375372	0	0.111436118913474	0	0.0145670632433042	0	0.0114068146544071	0.00990521277210389	0.127901138713551	0	0.275498853858744	0.0858933794906409	0	0	0	0	0.00767780633486042	0	0.00135062414756667	0.297416539510012	0	0.548890463702208	0.836052587041756
GSM3942860	0.0160939981380805	0	0.00962181536766288	0.0109560283285338	0.0534125032878355	0.0323374456210995	0.0278663849781176	0	0	0.0106855932908789	0.0809997968550534	0	0.178558498232723	0.0265293049379122	0	0	0	0.00158308544445647	0.00191013963378792	0	0	0.549445405883859	0	0.704968347741144	0.71467002663901
GSM3942861	0.0198357801441578	0	0.0178165615297909	0	0.0466494164443213	0	0.0197604070981057	0	0	0.0748604060498385	0.0200409555755696	0	0.215496235679554	0.000339306977553049	0.00205258190909067	0	0	0.00562540206114519	0.0441452925190251	0	0	0.533377654011849	0	0.721697973514957	0.695682359812287
GSM3942862	0.0426632970588027	0	0.0162115489576377	0.0309733794873733	0.0708667020254393	0	0.01416275886464	0	0.00847220080708942	0	0.06755971508221	0	0.211553347446345	0.0569093974900276	0	0	0	0.000426314537192586	0.00784671487637604	0	0	0.472354623366866	0	0.676366374891094	0.738147279332931
GSM3942863	0.0517229806363701	0	0.0129487874291997	0.000300106604842836	0.0725177099604184	0	0.0154566264908027	0	0	0	0.0762131180182221	0	0.240615889193011	0.0391592076012803	0	0	0	0	0.0113715985730244	0	0.0192260614266112	0.460467914066217	0	0.584566157161642	0.82270121557532
GSM3942864	0.0294357747875357	0	0.00519741850367899	0.0139275504255083	0.0363777959275388	0	0.0187102694019976	0	0.0107505748691031	0	0.0528837113354931	0	0.221756767901073	0.0460861709134348	0	0	0	0	0.0090524376759845	0	0	0.555821528258652	0	0.621408439540717	0.806686502520362
GSM3942866	0.0265305633322744	0	0.0209511616866828	0.00553065454494689	0.0312554612728702	0.00234977180024173	0.0927827086885218	0	0	0.102308413961508	0.042919518861753	0	0.0513464610230129	0	0	0.0182516074100679	0	0.00321659598188107	0.0402422772562504	0	0	0.562314804179989	0	0.747922064962882	0.665475309736117
GSM3942867	0.0266697682211843	0	0.0052068787193158	0	0.0763445341776623	0	0.0147677671440525	0	0	0.000258605354560955	0.0761914188615613	0	0.207389206852702	0.0406821722077119	0	0	0	0	0.0095952763200102	0	0	0.542894372141239	0	0.685093965294567	0.736923139239151
GSM3942868	0.00253876770327485	0	0.0147649810252157	0.0186093658687638	0.0395121288980069	0	0.0289426735539025	0	0	0.0171129709706614	0.0643367360567217	0	0.124763100891189	0	0	0	0	0.00447384795118168	0.0286291102168401	0	0	0.656316316864243	0	0.682584381975098	0.757253849715682
GSM3942871	0.0441361677832947	0	0.0144450715254719	0	0.0431127511498238	0	0.0157429468376841	0	0.0108471069895638	0.0343983564823558	0.0890833094489867	0	0.153317420615586	0.0651337861595537	0	0	0	0	0	0.100357630257648	0	0.429425452750031	0	0.615933249726998	0.789908212812323
GSM3942872	0.0466212180047694	0	0.0105864131631005	0.0866376294438666	0.0237225423756911	0.056318723993233	0.0589702945102268	0	0	0.0287624508322684	0.138727299139493	0	0.245218597237881	0.0492293449232056	0	0	0	0.00465621556302872	0.00251796654393253	0	0	0.248031304269304	0	0.567869538372442	0.822851825226517
GSM3942873	0.0299447060521066	0.00800143806511956	0.0537968898371384	0.041759205760214	0.057897415469271	0.0301443965222324	0.0176781592709122	0	0	0	0.0797865406571183	0	0.0392445579683403	0.0233925512882082	0	0.00203236738889944	0	0.00328476259918583	0.0028957844501101	0	0	0.610141224671144	0	0.748870331170366	0.666786955523598
GSM3942874	0.0299854647178922	0	0.0104512991320242	0.031894094791517	0.041612320772649	0	0.0187238776604998	0	0.00653796523438807	0	0.0511042434580988	0	0.223344906595474	0.033610896345562	0	0	0	0.000970385134555176	0.0124781154595203	0	0	0.539286430697819	0	0.749668549605835	0.664210013324448
GSM3942875	0.0115971426632944	0.0135265604479254	0.00693888509221074	0.0112174502227857	0.0370635334536002	0.0354630815633679	0.0364730345921129	0	0	0	0.0704902231235206	0	0.136492797840229	0	0	0.0025866456359967	0	0.00772930652176368	0.0122882152998967	0	0	0.618133123543296	0	0.747934388535383	0.671434681878399
GSM3942876	0.0275468352398984	0	0.0231865536586747	0.0429516263896039	0.096965807266315	0	0.0242750195817935	0	0	0.0199446238251324	0.0740784328768128	0	0.208524053564268	0.029954452986919	0	0	0	0	0.0252532377788737	0	0.000212782434576583	0.427106574397132	0	0.64661286299599	0.76312096530963
GSM3942877	0.0301094631691781	0	0.0146216369297318	0	0.0386687372349947	0	0.0173851218703066	0	0	0.0167809459564377	0.0843195201721203	0	0.265035576183815	0.061864148587341	0	0	0	0	0	0	0	0.471214849896074	0	0.597917541943679	0.815254890318967
GSM3942878	0.00187942754831593	0	0.0128215342516651	0.00650769726635046	0.0408829143936898	0	0.0232765429075646	0	0	0.00207666009826143	0.0602650779475337	0	0.448233026829763	0.039289720053178	0	0	0	0	0.0234692612253445	0	0	0.341298137478333	0	0.720462388585213	0.693211032421656
GSM3942879	0.0317049957294917	0	0.00511005677626398	0	0.0489795628644038	0	0.0174207744582574	0	0.00825057611414055	0.0205795605589315	0.0641882342787035	0	0.36887472861634	0.0516375009030037	0	0	0	0	0	0	0	0.383254009700464	0	0.632479170673359	0.77762199542332
GSM3942881	0	0.0100758406675036	0.0123673541467299	0.00662278749789514	0.0556381395004791	0.00236757358105545	0.0211374200671284	0	0	0.0113484907293338	0.0757882303968773	0	0.149693884832648	0.00358683705705311	0	0	0	0.00142225209352998	0.00404099245790292	0	0	0.645910196971863	0	0.742683150406279	0.684734582943686
GSM3942882	0.00259394184126802	0.0138106551107478	0.00529135879180321	0.0427117625112105	0.0819884919871239	0.00452915674605025	0.036035249462426	0	0	0.0539576761667169	0.0290981370072218	0	0.250362546369502	0	0	0	0	0.00115019665141483	0.0255508658410177	0	0	0.452919961513497	0	0.726718364355263	0.68736265336388
GSM3942885	0.0107018137197769	0	0.0116270996641393	0.0131763347284595	0.0517879699298431	0	0.0113746121953728	0	0	0.0227405833788476	0.0568843974994175	0	0.247808077152173	0.0241373685066739	0	0	0	0	0.0128605771015374	0	0	0.536901166123759	0	0.63723654452012	0.788384175064452
GSM3942886	0.0113812504027712	0	0.0176695024393664	0.0152293286939978	0.0448153726684758	0	0.015032804261711	0	0	0.0096520625473733	0.0780688769233614	0	0.13064619110031	0.0492151112136408	0	0	0	0	0.00841499452085853	0	0	0.619874505228134	0	0.749597503289886	0.670798176128143
GSM3942905	0.0303455462829299	0	0.0167776020653035	0.0271519772909467	0.0435612393662713	0	0.0224107874492446	0	0	0.00474373230841429	0.0989448681792936	0	0.18688794326492	0.0296251195224751	0	0	0	0	0.00444372996244557	0	0	0.535107454307755	0	0.708269397717819	0.710111825572588
GSM3942906	0.00273312885816319	0	0.0117913297830889	0.0244902128586195	0.0387049333847495	0	0.0332574485620026	0	0	0.0041806566850284	0.100863237903842	0	0.298235629127308	0.0504431864484515	0	0	0	0.00299003351536111	0.00369903699964545	0	0	0.42861116587374	0	0.658774002177551	0.754375367227103
GSM3942908	0.0204896428242085	0	0.0190669178160133	0.0371929051009334	0.0469164238537836	0	0.00732972029182013	0	0	0	0.086150816787456	0	0.226763587271094	0.0148471287085263	0	0	0	0.00163131159568288	0	0	0	0.539611545750482	0	0.64097907642677	0.783202932879479
GSM3942910	0.0429665933850227	0	0.014309917241368	0.034212522350966	0.0712594793656099	0	0.016821037018443	0	0.00182300344447992	0.011607564586332	0.0751084877642226	0	0.219603900657162	0.0365724552456579	0	0	0	0	0.00650650752868105	0	0	0.469208531412054	0	0.637963744743705	0.774520696627572
GSM3942911	0.0587998032840808	0	0.0192135965518195	0	0.118398735980344	0	0.0167042403222721	0	0	0.031116821705182	0.0915525837120683	0	0.238894880334779	0.0807200541835357	0	0	0	0	0.0130834901424382	0	0.0201414831290537	0.311374310654427	0	0.499203947327155	0.869935223720908
GSM3942912	0.021030440092863	0	0.0166661221072709	0.0122513218887915	0.0645642137015118	0	0.0225318883501545	0	0	0.00709275484987677	0.0735307380467423	0	0.120585752537262	0.00748998237537473	0	0	0	0.000473448883608526	0.0139411631660613	0	0	0.639842174000483	0	0.762184655407348	0.656472352202989
GSM3942913	0.056529210738905	0	0.0145345007610264	0	0.109169243153838	0	0.0151844393068086	0	0.0139578522014319	0	0.103663143646125	0	0.225342840036295	0.0539704212257606	0	0	0	0	0.0185680306579796	0	0.0213081025308822	0.367772215740947	0	0.547546615258582	0.839813709850013
GSM3942914	0	0	0.00807394717040343	0.026982854625579	0.0427045216113555	0	0.012386185077285	0	0	0.0433102606172816	0.0489489519911726	0	0.246208650177281	0.0123540881234192	0	0	0	0.00232341677368975	0.0292064208612441	0	0	0.527500702971289	0	0.774219683436702	0.6343065841075
GSM3942915	0.0235843469174454	0	0.0181412992073159	0.0111363218323218	0.0504625399319199	0	0.0174734316627705	0	0.00392103595091075	0.0103187728316497	0.0527901891505684	0	0.254484322848072	0.04246478203084	0	0	0	0	0.0169819505074581	0	0	0.498241007128727	0	0.72356113788363	0.691901259825096
GSM3942916	0.0437005337117399	0	0.012992902706623	0.0241744430887245	0.0356565212208326	0	0.0199794966571757	0	0	0	0.0797449275251091	0	0.157533353776455	0.0603636247242662	0	0	0	0	0.0101351448305411	0	0	0.555719051758533	0	0.744844347006465	0.67006183255259
GSM3942917	0.0239080915911507	0	0.0101167412936285	0.0359417242581358	0	0	0.0311185429923937	0	0	0.0254685717236384	0.128020056594551	0	0.367999280561996	0.0369473182906256	0	0	0	0	0.00874905107381538	0	0	0.331730621620065	0	0.786440716117418	0.63023701167091
GSM3942918	0.0431519962833121	0	0.0163846559199644	0	0.0624293428858149	0	0.0189092992860718	0	0.00526603703554958	0.0327607939196454	0.0643947633148728	0	0.331358641148058	0.0518370913104756	0	0	0	0	0.0188280671052331	0	0.025895583322951	0.328783728468051	0	0.621375181914107	0.783117714576311
GSM3942919	0	0.000685687958884018	0.0141234991658838	0.0117651100241164	0.0666635068036936	0	0.024684504420792	0	0	0	0.114264845642546	0	0.284849375110321	0.0547537881820184	0	0	0	0	0.0084775633173503	0	0	0.419732119374394	0	0.673740816838421	0.739372770271349
GSM3942920	0.088663882042424	0	0.0190601833735963	0.061677800374506	0.0599026202257597	0	0.0264055411232895	0	0	0	0.130205537340131	0	0.15073854323018	0.0653427509208195	0	0	0	0	0	0	0	0.398003141369295	0	0.582592203468078	0.814391599330373
GSM3942921	0.042951676886066	0	0.0179439508458911	0.0351162886061649	0.0881054432098757	0.0165188648469079	0.065172614053684	0	0	0.0223544735536484	0.143167804722725	0	0.25167679254153	0.0956773973553733	0	0	0	0.00591495777970774	0.00744428946060983	0	0	0.207955446137817	0	0.460098058199138	0.888406509990812
GSM3942922	0.035025758977214	0	0.0162911861872748	0.0297543221486206	0.0713995310320693	0	0.0186289173096801	0	0	0.0412590584314639	0.0365015719198107	0	0.181745502182561	0.00638951073870467	0	0	0	0.00374806832211884	0.0207973336722445	0	0	0.538459239078237	0	0.730507726815051	0.685302336986786
GSM3942923	0.00511684934169426	0	0.0161874131518308	0.0219896804642871	0.0515134962966135	0	0.0400536813542616	0	0	0	0.0815097174502816	0	0.324662436748497	0.00589390834894888	0	0	0	0.00256308157065382	0.0288214414644494	0	0	0.421688293808482	0	0.719877109655209	0.694132409660095
GSM3942924	0.00932203704813191	0	0.0105860873016734	0.0122694159371941	0.020715518131884	0.016432107922457	0.0233980333157762	0	0	0.0292562479433322	0.0668946600146367	0	0.286267789269985	0.0226723283611956	0	0	0	0.000774751689663851	0.0167101572209373	0	0	0.484700865843133	0	0.793486459564471	0.610206081750543
GSM3942926	0.06274216965894	0	0.0185286883734242	0.033919044132803	0.0393607537102026	0	0.0152176325686651	0	0	0.00776378900041987	0.062334793689434	0	0.182805067510466	0.0351459572012874	0	0	0	0	0.0304530736086673	0	0	0.511729030545691	0	0.63906726902239	0.777058353015466
GSM3942927	0.0388991483146892	0	0.00881622875552419	0.00122384413936806	0.0565566979921176	0	0.0114347591164403	0	0	0	0.100376803572978	0	0.229858433827769	0.0401822066966758	0	0	0	0	0.000532519021973759	0	0	0.512119358562464	0	0.611419276569571	0.807498854119157
GSM3942929	0.0336836953767652	0	0.0172258673756279	0	0.0777876299968374	0	0.0323905583691556	0	0	0.0671452387604367	0.0917211272369885	0	0.229636925723584	0.0321429527447053	0.00164614156562171	0.0136941984307418	0	0	0.013843571316992	0	0.0419979903795258	0.347084102723018	0	0.487270499156461	0.882036821335148
GSM3942932	0.0190398227784874	0	0.00828327645736312	0.0205624031547511	0.058504367422125	0	0.0346461250949771	0	0.008383742499504	0.0116736169308826	0.0805560905631902	0	0.283300013233122	0.0578398639597948	0	0	0	0	0	0	0	0.417210677905803	0	0.682351661778867	0.731068118094415
GSM3942935	0.0245922177000692	0	0.00504883330312008	0.0262840381052369	0.0630094145378807	0	0.0119190186581925	0	0	0	0.0701685989823309	0	0.105946596226824	0.0388663301691259	0	0.00770696516288342	0	0	0.0225651596875326	0	0	0.623892827466804	0	0.718684251805133	0.707361959570167
GSM3942936	0	0	0.0136266777575671	0.0404332773843826	0.0277783997919316	0	0.0417470272633888	0	0	0.0299419433645157	0.0803860928367485	0	0.198440669880069	0.0259031854388221	0	0	0	0.00501990944187765	0.019533466837029	0	0	0.517189350003668	0	0.753004368720994	0.659133325797918
GSM3942937	0	0.000241633212592671	0.0129276298548435	0.0501846253764306	0	0.00325175614105145	0.169966002285519	0	0	0.139322049548896	0.126436217961331	0	0.0235534679349437	0.0213030974942915	0	0	0	0.00292974025842328	0.0408475916554229	0	0.00221483037745123	0.406821357898803	0	0.631705551265146	0.775345705762708
GSM3942938	0.0301370797834695	0	0.00991029606059323	0.0276562525515345	0.0606783174291899	0	0.0180984599535159	0	0.00723895707881845	0.0113450776152338	0.0754383491336466	0	0.142956362839935	0.0467033611044217	0	0.00375292142567144	0	0	0.00245910877670865	0	0.00151087826321637	0.562114577984045	0	0.579783632316667	0.841491035417722
GSM3942939	0.0332689913974603	0	0.0106755931304342	0.0373237476704326	0.0313461959053427	0	0.0223391431159727	0	0	0	0.0729038018784288	0	0.179815923637894	0.0442422179918073	0	0	0	0	0.00149470702802841	0	0	0.5665896782442	0	0.618746196678707	0.808241865525814
GSM3942940	0.00937937260378596	0.000985811969002822	0.0173687991770944	0.077946890593408	0.0177809500557459	0	0.064162753933594	0	0	0.0204410422658745	0.151364399765313	0	0.411573968781843	0.0450746703106857	0	0	0	0	0.00579038817406494	0	0.0180226070402403	0.160108345329347	0	0.54411763352537	0.838203544137183
GSM3942942	0.0390657386478718	0	0.0151994786383928	0.0124218619654276	0.0469175301460507	0	0.0180890073602898	0	0	0.0440010273790645	0.0236517327504811	0	0.143985310141497	0.0214985636474373	0	0	0	0.000863693406250512	0.0184554424373788	0	0	0.615850613479858	0	0.757664026707589	0.660175513834129
GSM3942943	0.037558631758491	0	0.0216319116429029	0.0232181554294122	0.042051750703864	0	0.0157527993065867	0	0.00432574157710759	0.0284088745806128	0.0308474312315219	0	0.236465553137892	0.0439759771091375	0.000806484181661323	0	0	0	0.021199472687265	0	0.0241595280736365	0.469597688579908	0	0.57144789568261	0.835682454534525
GSM3942944	0.0804979153619079	0	0.00459092435630072	0.0783265232682004	0.0498582046333496	0	0.0414826755634993	0	0	0	0.127417963685206	0	0.0747987265492199	0.0423914935307452	0	0	0	0	0	0	0	0.500635573051571	0	0.693655109588329	0.721788450203484
GSM3942973	0.0659851476176298	0	0.0156873639080936	0.043853009704473	0.0978921456204281	0	0.0186144652076432	0	0.0122992430721895	0	0.0943879865161839	0	0.172347678567677	0.0460077859121985	0	0	0	0	0	0.00221079491592112	0	0.430714378957563	0	0.61365669129431	0.791265301955872
GSM3942974	0.0477806091903664	0	0.00990645046324827	0.027390364119594	0.0659387285505085	0	0.015009460318744	0	0.00479958873605513	0	0.0786291604344633	0	0.276066905782073	0.0484259470281132	0	0	0	0	0	0	0.0190374249885232	0.40701536038831	0	0.601026933277655	0.803374247953491
GSM3942975	0.0136984587771429	0	0.0113902574796472	0.0213229122960028	0.0465087894946759	0	0.0242762991656567	0	0	0.0208701903940701	0.0736828178863616	0	0.211038586808537	0.0465908124200427	0	0	0	0	0	0	0	0.530620875277863	0	0.759474078816419	0.652115140948459
GSM3942976	0.0230298354874364	0	0.0113042406197698	0.0290919309488487	0.0338230401120488	0	0.0177472175331825	0	0	0	0.0738224035223405	0	0.183480685096543	0.0759641088115593	0	0	0	0	0.00183385498250319	0	0	0.549902682885768	0	0.775603632993557	0.632978566058485
GSM3942977	0.00875689978217285	0	0.01464173898165	0.0111259871282763	0.0544688651774718	0	0.0220160312600668	0	0	0	0.0623533698583728	0	0.0726081167508029	0.0162221599173629	0	0	0	0.00163346127136654	0.0206658865783605	0	0	0.715507483294097	0	0.70649931079043	0.742250227505627
GSM3942978	0.0152136822547149	0	0.0153754321035494	0.0290032247309778	0.0719002211112135	0	0.00703985682902105	0	0	0	0.072706584178171	0	0.370695176839977	0.0197644591732443	0	0	0	0	0.0146784290942238	0	0	0.383622933684907	0	0.753467427870274	0.659616325606249
GSM3942979	0.0072297707304626	0	0.0124473935539704	0.0455386382370693	0.0990000604922886	0.00952846564180809	0.0302445804502973	0	0	0	0.0687634772404285	0	0.200033635318602	0.0474944556860331	0	0	0	0.0027865459143807	0.0149858863360285	0	0	0.461947090398631	0	0.732394081594116	0.681865698043324
GSM3942983	0.0651899315366759	0	0.0158622933268187	0.0678022120828064	0.104824483968151	0	0.0187937676998386	0	0.0121244290566405	0	0.139444818463531	0	0.209018401815109	0.112417190456323	0.000186280870484655	0	0	0	0.00316036512299126	0	0	0.251175825600629	0	0.540241466827805	0.84083936596987
GSM3942984	0.0340745479383656	8.63719042523976e-06	0.0267823371407578	0.0826029330130515	0.103795235217077	0.00249299280733701	0.0252831738655323	0	0	0	0.139404009252974	0	0.145805851938655	0.0349472575603223	0	0	0	0	0.0165093783282292	0	0.00892921268674174	0.37936443306053	0	0.52360281884873	0.856198358523842
GSM3942985	0.000974350805159115	0	0.0106393254301896	0.0165071116891963	0.0294587428596904	0	0.0169529016831171	0	0	0.00273192771729352	0.069476009316275	0	0.368035047036733	0.0230132259057731	0	0	0	0.00272607101922258	0.0122781806039231	0	0	0.447207105933427	0	0.745607341017903	0.666806828420294
GSM3942986	0.0236445632242392	0	0.0127392788730859	0.0127618640084762	0.0322720744770772	0	0.0155291786605767	0	0	0.0293420335236473	0.0465585242908895	0	0.280806522470461	0.029317028419775	0	0	0	0	0	0.0113264118858182	0	0.505702520165954	0	0.706093300709219	0.713118615402216
GSM3942987	0	0.0135021122253905	0.00988122019972377	0.0340342474184469	0.0192217269230487	0	0.0445567331172776	0	0	0	0.0882753846661462	0	0.134800555880566	0.0551518178853479	0	0	0	0	0	0	0	0.600576201684052	0	0.771695784552346	0.640294935058282
GSM3942988	0.012682458367967	0	0.0130245125407119	0.0426902266594296	0.0679757525677788	0	0.00706649899226265	0	0	0	0.0641673216017178	0	0.304627557329138	0.0335799614956162	0	0	0	0	0.0132678247806228	0	0	0.440917885664756	0	0.701775674105704	0.712883055394158
GSM3942989	0.0798533185158773	0	0.0198471471293839	0.0271723594279357	0.0719247384469632	0	0.0156490834589797	0	0	0	0.113992649125673	0	0.202706215944253	0.0839040101240047	0	0	0	0	0	0	0	0.38495047782693	0	0.54008238084123	0.847018902965987
GSM3942990	0.062509732713102	0	0.0198024097971724	0.0400645375318247	0.0566829622074853	0	0.0211398701110525	0	0.0149232477154046	0	0.0636005551808465	0	0.226948599404908	0.0498624118560636	0	0	0	0	0.000949144507700332	0	0	0.44351652897444	0	0.65162966277151	0.759941120060132
GSM3942991	0.00726619198895141	0	0.0198708789942622	0.0456474813393145	0.100028236189435	0	0.016890535357019	0	0.0113024667110039	0	0.108548576995037	0	0.236865762002249	0.0722723628752645	0	0.00289658230964776	0	0	0.0126065506556261	0	0	0.36580437458219	0	0.570699434935142	0.822718997879445
GSM3942992	0.0388038183535518	0	0.0188108960184271	0	0.0902861294844839	0	0.0197187808461811	0	0	0.0109694906573792	0.131726793394783	0	0.168498109320095	0.0878491991956583	0.00469181060785786	0	0	0	0.000401693180040852	0	0.0653884569111492	0.362854822030393	0	0.495824272341339	0.87629058038564
GSM3942993	0.0830410101633571	0	0.0148108841785889	0.0350102018830628	0.0609815873238861	0	0.0198792935498475	0	0.0135438798546791	0	0.106231687028349	0	0.152921122342882	0.0449410144609674	0	0	0	0	0	0.00351996963300549	0.0311535410641224	0.433965808517253	0	0.615045017079638	0.790452071366563
GSM3942994	0.0258584104775725	0	0.0123996123558533	0.00418634344782682	0.0492909875474375	0	0.0179971138512901	0	0	0.00476995674531702	0.0459375081837524	0	0.119489711770455	0.0384746311768784	0	0	0	0	0.0309432682118765	0	0	0.65065245623174	0	0.769545632260933	0.648896214745951
GSM3942996	0.0345068367524278	0	0.0115787291033732	0.00675622598350321	0.0592781499819178	0	0.0128684066166506	0	0	0	0.0847819267898634	0	0.186958745035763	0.0466305281921997	0	9.79975840194311e-05	0	0	0	0.0109771166815	0	0.545565337278781	0	0.633682910724751	0.789410863551443
GSM3942997	0.0722643350219057	0	0.0223015599977569	0.0759401527145274	0.0344218552698817	0	0.0396851224062432	0	0	0.0275310417788745	0.114551372267814	0	0.131433908881033	0.0561234337649295	0	0	0	0	0.00733035182418554	0	0	0.418416866072848	0	0.63926756286803	0.769422375754361
GSM3942998	0.0204063372802279	0	0.00454581983369014	0.0542991102150826	0.0668177041443679	0	0.037215342895737	0	0	0	0.111739369383508	0	0.274747499530044	0.031490669237495	0	0	0	0	0	0.00444722330441675	0	0.39429092417543	0	0.613911385034212	0.791099718454565
GSM3942999	0.0638156596212321	0	0.021445277871505	0.0431319428776412	0.0552434814145162	0	0.00989388652405599	0	0.00886299036213658	0	0.0752607191456246	0	0.214825355829328	0.0484027417324465	0	0	0	0	0.0195977369955366	0	0.00379591855929553	0.435724289066681	0	0.505481805029409	0.880565443859517
GSM3943001	0.0111217530867728	0	0.0137008499574004	0.0227172472847658	0.0743343146146797	0	0.0103348715064986	0	0	0	0.0701153365984362	0	0.159285657057639	0.0387604689860238	0	0	0	0.000333610886399358	0.00555503120332348	0	0	0.59374085881806	0	0.731379547569517	0.689968762699629
GSM3943002	0.0335421061822781	0	0.0177605148159917	0	0.0406685810642465	0	0.0152165065375482	0	0	0.0212164585897295	0.0654659623672762	0	0.137540246361905	0.0413238030534177	0	0.0069965734975805	0	0	0	0.0744301246951249	0	0.545839122834902	0	0.573937209577547	0.843312880199308
GSM3943003	0.0239719577159034	0	0.0106169732760373	0.0329095401875517	0.0484871942548611	0	0.0153731305514769	0	0	0	0.102326184202892	0	0.144298495462621	0.0421794074798894	0	0	0	0	0	0	0	0.579837116868767	0	0.76438881620402	0.648237540899892
GSM712478	0.00546928196832165	0	0.00365559386213995	0.145411579387838	0.0219385398754016	0.00740641702335267	0.0191350698654382	0	0	0	0.135549501743909	0	0.34395052661914	0.0190073804025367	0	0	0	0.00223444947727072	0.00573940376921048	0	0	0.290502256005441	0	0.766145324025621	0.65963904884027
GSM712479	0.0060354848309808	0	0.0039584868200767	0.0854228087776652	0.0173268658016215	0.0274630611641669	0.0226227482876972	0	0	0.0121537235861786	0.137955996728725	0	0.292860341461925	0.0170767832345947	0	0	0	0.00261338332529611	0.0124318045540977	0	0	0.362078511426974	0	0.768845769933193	0.649791047396166
GSM712480	0.0118583001373358	0	0.0147136717931467	0	0.0446169050534642	0	0.0150302269882517	0	0	0	0.103033219938999	0	0.315685454679122	0.0666190782175975	0	0	0	0	0	0	0	0.428443143192083	0	0.592992630943778	0.816019579442499
GSM712481	0.0539937457061409	0	0.0484632470712081	0	0.0636058810591961	0	0.0178502964352978	0	0.000104101729490693	0.00135031503209509	0.0764596261081845	0	0.278336021202471	0.0734363914458657	0	0	0	0	0	0	0	0.38640037421005	0	0.545325662853143	0.84622523352374
GSM712482	0.018313177292514	0	0.01006193029408	0	0.0539174249104775	0	0.013728944964167	0	0	0	0.0664274237301843	0	0.198762257705019	0.0399546641018215	0	0	0	0	0	0	0	0.598834177001737	0	0.600123297303082	0.838324309839924
GSM712483	0.0150274233133865	0	0.0101603806053477	0	0.0184655004701486	0.000699332701392664	0.0104194642312511	0	0	0.0113073652387729	0.0558873129154513	0	0.162005739881856	0.031755630179218	0	0	0	6.64025941425445e-05	0.00421884574742985	0	0	0.679986602121603	0	0.63849646043068	0.822176673802596
GSM712484	0.0102853106720454	0	0.00668230208477828	0	0.0745268655654392	0	0.0156238804207194	0	0.0102397692934181	0.0137922816180719	0.0824107949475998	0	0.307777922057442	0.0854996925481817	0	0	0	0	0.00518955627566694	0	0.0125144521235032	0.375457172393133	0	0.462070687011319	0.911298079742452
GSM712485	0.0128829402894674	0	0.0142896668702804	0.0146864901498388	0.0981384486259605	0	0.0352395288050641	0	0	0.0627928929263538	0.0772870682644658	0	0.152876518778699	0.0284850982533618	0	0	0	0	0.00346118597928536	0	0	0.499860161057223	0	0.647611805275629	0.766776496390467
GSM712486	0.0168822659332988	0	0.0186767272774204	0.0182020142348778	0.0242934024084575	0.0242396904977839	0.0667173678218263	0	0	0.04094025042347	0.0740752558105548	0	0.114884069321058	0.0190344912623765	0	0	0	0.00232050858674401	0.0224984662326465	0	0.159062343501867	0.398173146687618	0	0.529177003866302	0.855309587288775
GSM712487	0.00026103922477197	0	0.0691893776615352	0.00897926916019439	0.043483899631014	0	0.0297431234155574	0	0	0.0341630630587044	0.0443569902864963	0	0.253228907357267	0.0539082732242589	0	0	0	0	0.0209495435234907	0	0	0.441736513456709	0	0.676851289821948	0.73655394389253
GSM712488	0.0382289012867451	0	0.0021707888540979	0.222683900241831	0.109387345835579	0	0.0171980946881173	0	0	0	0.223270712667702	0	0.140792709721598	0.00643085833648881	0	0	0	0	0	0	0	0.23983668836784	0	0.791610533256051	0.64992524247469
GSM712489	0.0188456098449256	0	0.0105563654137158	0.0289020310952048	0.101611781378858	0.0719964530792656	0.0359560541892738	0	0	0	0.12194968021488	0	0.154380468531638	0.0241484984084648	0	0	0	0	0.0112087614993797	0	0	0.420444296344394	0	0.822893611578843	0.595276097840358
GSM712490	0.0620085014350541	0	0	0.106144771626895	0.120785757633886	0.0864823778431047	0.0148404236971942	0	0	0	0.149158659012386	0	0.142333079615945	0.00589699185070357	0	0	0	0.00245912472137052	0.00179806344162486	0	0	0.308092249121836	0	0.802431547823271	0.64048255843736
GSM712491	0.00895491658888536	0.0337261784167013	0.00193174291517904	0.0793958211564785	0.100499787562932	0.137604138309464	0.0152054045911202	0	0	0	0.140777838276669	0	0.0999445312675065	0	0	0	0	0.000943820045494363	0.011102261462608	0	0	0.369913559406961	0	0.823420174083902	0.609293923109256
GSM712492	0	0.0228651852137636	0.0031771796022109	0.0803245444897572	0.109293592529506	0.048761113561034	0.0330692861352689	0	0	0	0.118306688362464	0	0.136810845661776	0	0	0	0	0.00310478346527822	0.0151073704694038	0	0	0.429179410509539	0	0.828495290931308	0.587815863970322
GSM712493	0.0108959386867569	0.0102750330118696	0.0071389977598465	0.0853137709188524	0.151951673500804	0.102238944037337	0.00756889138089576	0	0	0	0.121662358061298	0	0.170573731672784	0	0	0	0	0.00190850252498735	0.0136302522281607	0	0	0.316841906216408	0	0.81220292054416	0.629031035444134
GSM712494	0.0792986923418425	0	0	0.12053207679033	0.165402704317349	0.0289899790485686	0.0300354800562102	0	0.0189005735783619	0	0.13516617411293	0	0.10727897158538	0	0.000254400238080367	0	0	0.000885510555608358	0	0	0	0.31325543737534	0	0.780467710132801	0.660978139683733
GSM712495	0.0863101575364651	0	0	0.0944358669850109	0.0892434861841973	0.0407551097693424	0.0236156763205272	0	0	0	0.111603408599164	0	0.14284439768287	0	0	0	0	0.000386761200287992	0	0	0	0.410805135722135	0	0.817157180564811	0.603897133331354
GSM712496	0	0.0273529797127266	0.000299169305087322	0.146262976248867	0.114755001258722	0.0008220794795529	0.023526882253222	0	0	0	0.135574061698755	0	0.145547870626153	0	0	0	0	0.0013730934002244	0.0113384852171019	0	0	0.393147400799589	0	0.815222467035754	0.60768399398846
GSM712497	0.032333526765995	0.0145738480411569	0.0053781852475562	0.0682567764396422	0.143193639180586	0.0440853411020695	0.0308953028795705	0	0	0	0.0790832571947779	0	0.197740349576863	0.0186139267973884	0	0	0	0	0.0203971160409059	0	0	0.345448730733489	0	0.795806001349278	0.63903030860157
GSM712498	0.0252616643004155	0	0.0141109402111178	0.0509122732585948	0.171117456105151	0	0.0597695379190568	0	0	0	0.116310502014475	0	0.150620995366704	0.0250130056075361	0	0	0	0.000787578644505949	0.0244433341482513	0	0	0.361652712424192	0	0.813689503057935	0.622765831567522
GSM712499	0.0445851218286001	0	0.0146648812286175	0.0895958873913765	0.156665930447189	0.000803556062571846	0.0254882032683343	0	0	0	0.135037218392626	0	0.069978456491979	0	0	0	0	0	0.0173582927766756	0	0	0.44582245211203	0	0.828564082886058	0.588163914960556
GSM712500	0.045547020179316	0	0	0.0587899178082597	0.0829806094211518	0.0802041461885627	0.00742708421523569	0	0.00332964877563318	0	0.259813241148183	0	0.1612735678691	0	0	0	0	0	0.016543291672135	0	0	0.284091472722424	0	0.803143302851486	0.635616400830712
GSM712501	0.0670577247978447	0	0.000980956047590421	0.0906052171955746	0.0264402293373723	0.110810151150944	0.0382773499499478	0	0	0	0.135342850349138	0	0.149228076792684	0	0	0	0	0	0.0159786163325988	0	0	0.365278828046306	0	0.788512945908355	0.643058873438807
GSM712502	0.0150053812259668	0.0137164760439603	0	0.158259030075956	0.0498895284237947	0.0539223365399607	0.0475456370657763	0	0	0	0.214809517477211	0	0.173364654507085	0.0186975270859245	0	0	0	0	0	0	0	0.254789911554364	0	0.785982081852228	0.656723961288495
GSM712503	0	0.0128496944011822	0.00513713445951832	0.149768495977559	0.0769712094333492	0.126102394927982	0.0198930033631577	0	0	0	0.111571085871581	0	0.128002235618199	0.00557363967607153	0	0	0	0	0.0176688349557378	0	0	0.346462271315661	0	0.784563020303715	0.649271949144636
GSM712504	0.00260473998570865	0.0625102658886844	0	0.137478495985255	0.102562950155218	0.0317430053010438	0.0132678487192782	0	0	0	0.172768934265603	0	0.163024109136552	0.00173232428599422	0	0	0	0	0.0143663034432339	0	0	0.29794102283343	0	0.785942315462492	0.654973019959535
GSM712505	0	0.0378282873705846	0.00986036486577885	0.136564393200675	0.0811024463536463	0	0.0292253712880965	0	0	0	0.150911356972612	0	0.182336616243445	0.0135343066247732	0	0	0	0	0.0144880814108945	0	0	0.344148775669495	0	0.776606077558982	0.654531762153265
GSM712506	0.000737759113182467	0.00917484683761431	0.0214228710186882	0.0709975488031875	0.111543344432367	0.0740764220345837	0.0349181963597744	0	0	0	0.0851629982399781	0	0.211350872514908	0.0082727937716919	0	0	0	0	0.00976652700778693	0	0	0.362575819866237	0	0.800381582315328	0.628749517539394
GSM712507	0	0.0238413817845452	0.00829448936993637	0.108693776735519	0.122643671765763	0.032093793403222	0.0122745447331778	0	0.0009691056397847	0	0.170313808523058	0	0.161877659369852	0	0	0	0	0	0.0201933624870253	0	0	0.338804406188117	0	0.807347837202188	0.626908610877306
